# Supplementary material for: Integration of metabolomics, transcriptomics, and microRNA expression profiling reveals a miR-143-HK2-glucose network underlying zinc-deficiency-associated esophageal neoplasia
Source: PubMed Central journal article supplement (PMC5669858; doi:10.18632/oncotarget.18434), 2017-06-09
Supplement: oncotarget-08-81910-s001.pdf [file oncotarget-08-81910-s001.pdf]

# Integration of metabolomics, transcriptomics, and microRNA expression profiling reveals a miR-143-HK2-glucose network underlying zinc-deficiency-associated esophageal neoplasia

## Supplementary Material

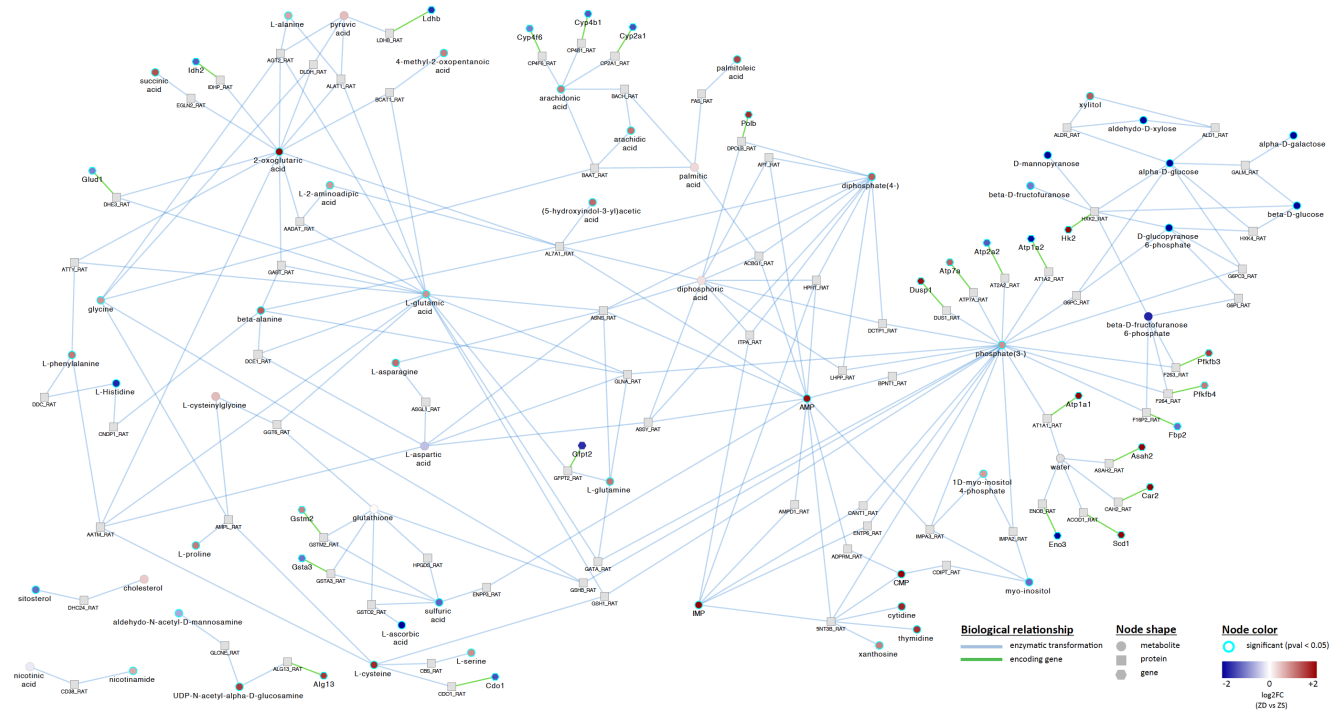

Supplementary Figure 1: A gene-metabolite integration network in ZD vs ZS esophagus calculated by queries from the 2,305 deregulated genes (reference #16) and 71 significantly deregulated metabolites (Table 1)
